# Supplementary material
Source: publisher site journal article supplement (https://en-cdn.bio-protocol.org/attached/file/20220111/Supplementary%20Figures%20S1%20S4.docx)
Supplement: Supplementary file 1 [file Supplementary%20Figures%20S1%20S4.docx]

**Supplementary Figures** Raw images for testing out scoring algorithms. See also Figure 2.


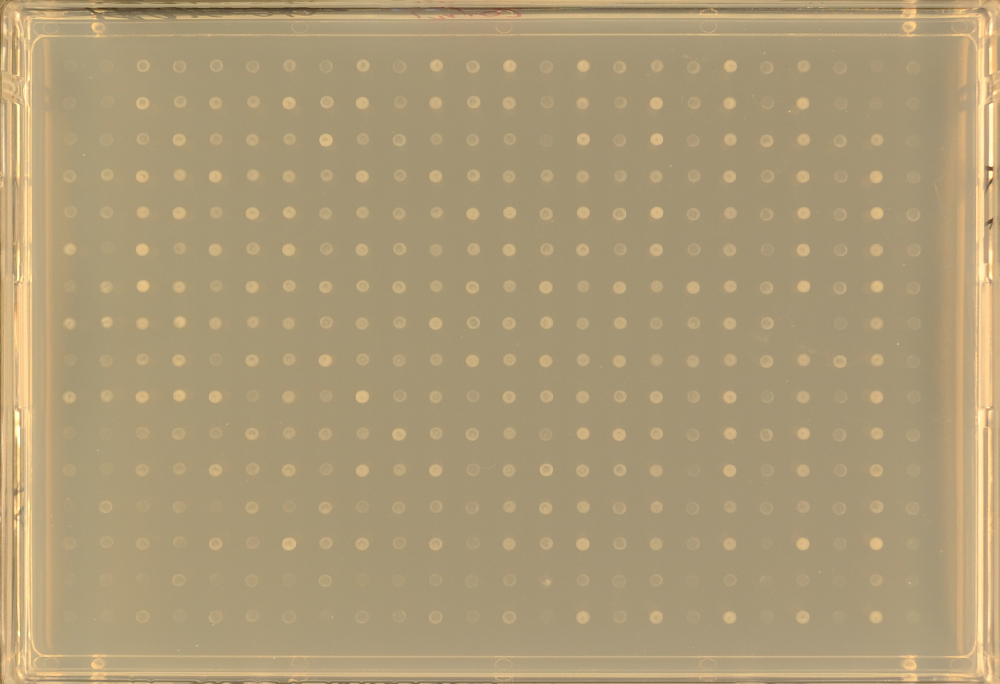


**Figure S1.** **Example plate exposed to light photographed at day 0.**


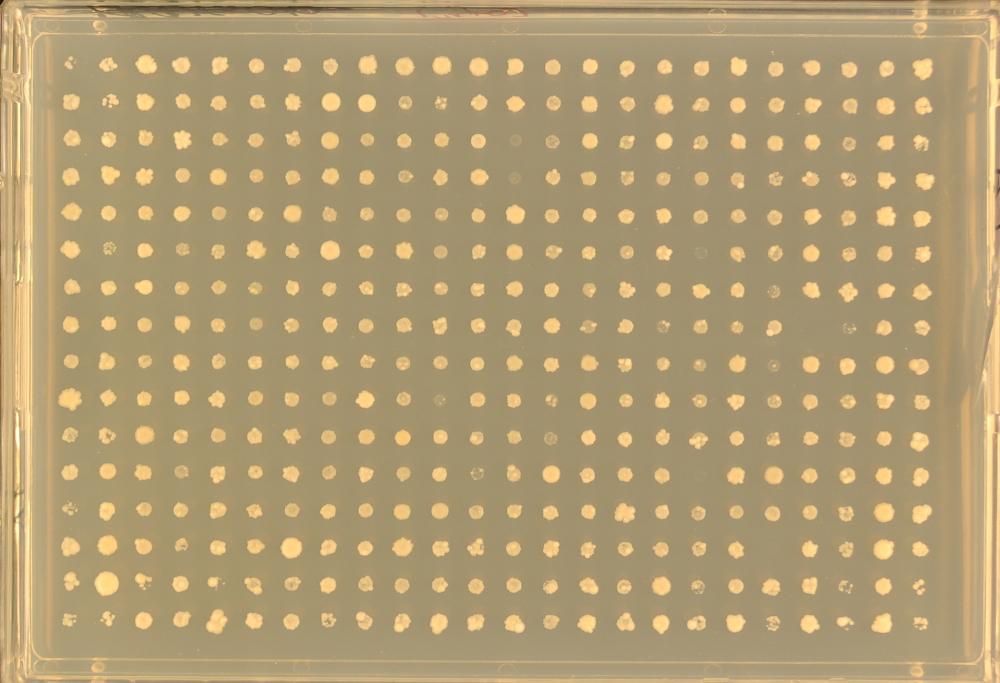


**Figure S2.** **Example plate exposed to light photographed at day 6.**


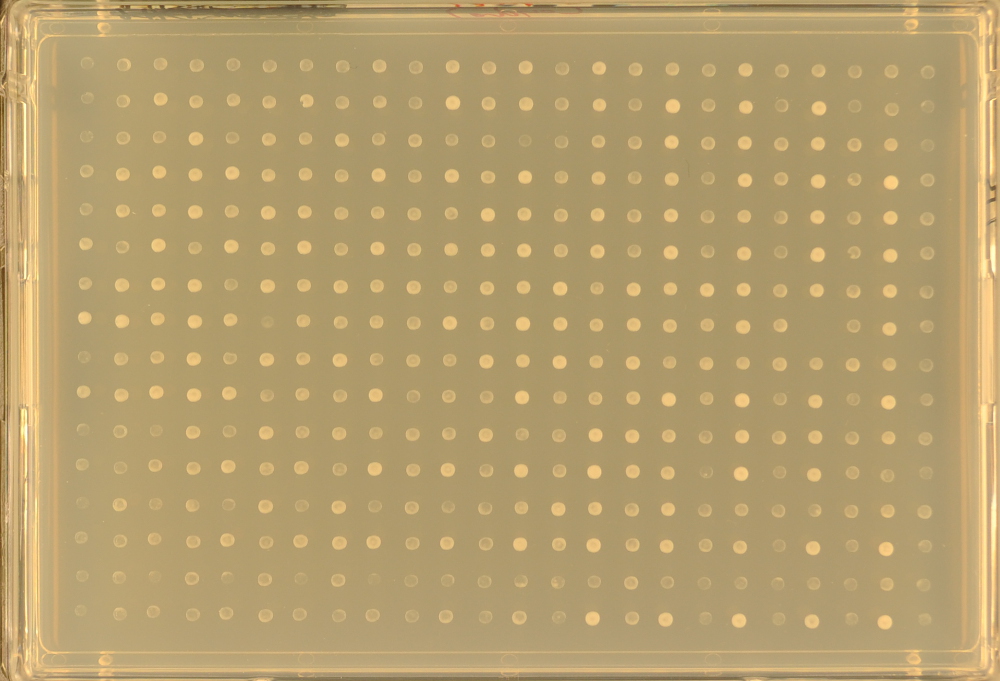


**Figure S3.** **Example plate incubated in the dark photographed at day 0.**


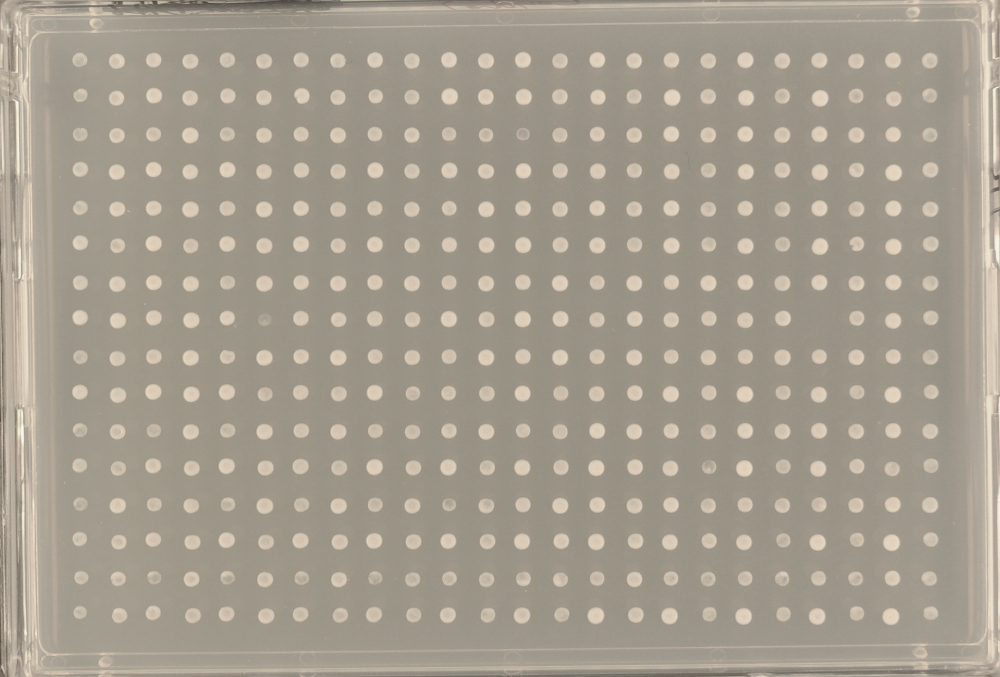


**Figure S4.** **Example plate incubated in the dark photographed at day 1.**
